# Supplementary material
Source: PubMed Central journal article supplement (PMC3143617)

## SUPPLEMENTAL DATA

### RECOGNITION OF PATHOGENIC MICROBES BY THE *DROSOPHILA* PHAGOCYTTIC PATTERN RECOGNITION RECEPTOR EATER\*

Yoon-Suk Alexander Chung and Christine Kocks

From Department of Pediatrics and Department of Molecular Biology, Massachusetts General Hospital, Harvard Medical School, Boston, MA 02114

Running head: Pathogen recognition by *Drosophila* phagocytic receptor

Address correspondence to: Christine Kocks, PhD, Massachusetts General Hospital, 185 Cambridge Street CPZN 7.250, Boston, MA 02114. Tel: 617-771-2915, Fax: 617-726-5949, E-Mail: kocks @molbio.harvard.edu

### SUPPLEMENTAL EXPERIMENTAL PROCEDURES

*Deglycosylation of Eater-Fc*– Eater-Fc fusion protein was incubated overnight at 4°C in PBS under non-denaturing conditions with or without (mock control) Peptide:N-glycosidase F (PNGase F; New England Biolabs). Deglycosylated Eater-Fc was subsequently used for SDS-gel analysis (controls; uncleaved or after thrombin cleavage) or in flow cytometry binding assays (uncleaved).

*Fluorescence microscopy*–  $5 \times 10^6$  heat- or ethanol-inactivated Gram-negative bacteria in 5  $\mu$ l were allowed to adhere for 30 minutes to poly-L-lysine coated coverslips and incubated for 30 minutes with 200  $\mu$ M Eater-Fc followed by 1  $\mu$ g/ml streptavidin-Alexa Fluor 488 conjugate (Invitrogen), then embedded in mowiol 4-88. Micrographs were taken on a Nikon TE-2000U microscope with a 60 x oil objective and Openlab 5.5 software (Perkin Elmer).  $1.25 \times 10^5$  *M. luteus* was used as a negative control.

*Pre-embedding gold labeling EM*– At 4°C, 500  $\mu$ M (25  $\mu$ g/ml) biotinylated Eater-Fc fusion protein was pre-incubated in PBS for one hour with 2.7  $\mu$ g/ml Streptavidin-15 nm colloidal gold conjugate (Ted Pella Inc.) and then rotated in a total volume of 100  $\mu$ l for 16 hours with  $1 \times 10^7$  *E. coli*, either heat-inactivated, or cecropin A-killed, or live. Labeled bacteria were washed once with PBS and resuspended in 2 % glutaraldehyde and stored at 4°C. Fixed bacteria were pelleted, rinsed once with 0.1 M sodium cacodylate buffer (pH 7.4) and re-pelleted. Bacterial pellets were stabilized with 2.0 % agarose before dehydration and embedding in Eponate resin (Ted Pella Inc.). Thin sections were collected onto formvar-coated slot grids, post-stained with 2.0 % aqueous uranyl acetate and examined in a JEOL 1011 transmission electron microscope at 80 kV. Images were collected using an AMT digital imaging system (Advanced Microscopy Techniques).

### SUPPLEMENTAL FIGURE LEGENDS

FIGURE S1. **Eater-Fc binding to bacteria is dependent on glycosylation.** *A.* Coomassie Blue stained SDS gel (15 %). Biotinylated Eater-Fc was deglycosylated with PNGase F under non-denaturing conditions or mock-treated, and thrombin-cleaved where indicated. Deglycosylation is evident as a size shift of full length or thrombin-cleaved Eater-Fc towards lower molecular weights (compared to mock-treated control). *B* & *C.* Flow cytometry analysis of binding by 200  $\mu$ M biotinylated Eater-Fc fusion protein, either mock-treated (black curve) or deglycosylated with PNGase F (red curve). Deglycosylated, PNGase F-treated Eater-Fc showed undiminished binding to Protein A-conjugated microspheres (*B*). In contrast to mock-treated Eater-Fc, deglycosylated, PNGase F-treated Eater-Fc had lost its binding activity to the heat-inactivated Gram-negative bacteria *E. coli* or *P. aeruginosa*. No significant binding was detected to live bacteria Gram-negative bacteria (*C*).

**FIGURE S2. Eater-Fc binds to both, heat-inactivated and ethanol-fixed Gram-negative bacteria.** Fluorescence microscopy of bacteria stained with 200  $\mu\text{M}$  biotinylated Eater-Fc fusion protein. Binding was observed with heat- and ethanol-inactivated Gram-negative bacteria (*E. coli*, *S. marcescens* and *P. aeruginosa*), but not the Gram-positive actinobacterium *M. luteus* (control). EtOH-I., ethanol-inactivated; H.-I., heat-inactivated.

**FIGURE S3. Eater-Fc binds to heat-inactivated, rough LPS mutant *S. marcescens*.** Flow cytometric analysis of binding by 200  $\mu\text{M}$  biotinylated Eater-Fc fusion protein (open black curve) or control biotinylated IgG1 and IgG-Fc (broken black or broken gray curves, respectively) compared to secondary reagent only (gray filled curve) or unstained microbes (open gray curve). Eater-Fc bound well to heat-inactivated rough LPS mutant *S. marcescens* and wildtype, but not to heat-inactivated *M. luteus* (control). No binding was detected to live rough LPS mutant or wildtype *S. marcescens*.

**FIGURE S4. Concentration and time-dependent killing of *E. coli* by cationic AMP.** Live *E. coli* were incubated in the presence of cecropin A at 25°C, transferred briefly to ice and analysed immediately by flow cytometry in the presence of the viability stain PI. *A.* Dose dependent killing of *E. coli* by cecropin A (0 to 4  $\mu\text{M}$ ; blue curve) compared to cationic control peptide 2K1 (red curve). Histograms corresponding to increasing amounts of cecropin A (0.5 to 2  $\mu\text{M}$ ; blue boxes) or 4  $\mu\text{M}$  cationic control peptide 2K1 (boxed in red) are shown below the line graph. These experiments were repeated three times with similar results. *B.* Time and concentration-dependency of *E. coli* killing by cecropin A. Time dependent killing kinetics for three different concentrations of cecropin A: 1  $\mu\text{M}$  (red), 0.5  $\mu\text{M}$  (blue) and 0.25  $\mu\text{M}$  (green). At 1 and 0.5  $\mu\text{M}$  of cecropin A bacterial killing was rapid. Slower killing kinetics were observed with lower amounts of cecropin A (0.25  $\mu\text{M}$ ). The apparent viability decrease and increase in the later time points in the blue curve likely reflects experimental variability.

**FIGURE S5. Pre-embedding gold labeling EM shows Eater-Fc binding to cell envelopes of *E. coli* after membrane disruption.** *E. coli* was used either heat-inactivated, or killed with cecropin A or live, and labeled with 500  $\mu\text{M}$  pre-formed, biotinylated Eater-Fc-Streptavidin-gold conjugate before processing and thin sectioning for EM. *A.* Heat-inactivated *E. coli* labeled with Eater-Fc (upper panel) or secondary reagent only (middle panel). *B.* *E. coli* killed with cecropin A (4  $\mu\text{M}$ ) for 10 minutes at 25°C (upper panel) or used live (0  $\mu\text{M}$  cecropin A) (middle panel). *A, B.* Magnification 60,000x. (Lower panels) Quantification of gold label associated with bacteria. “n” indicates number of bacteria analysed.

FIGURE S1

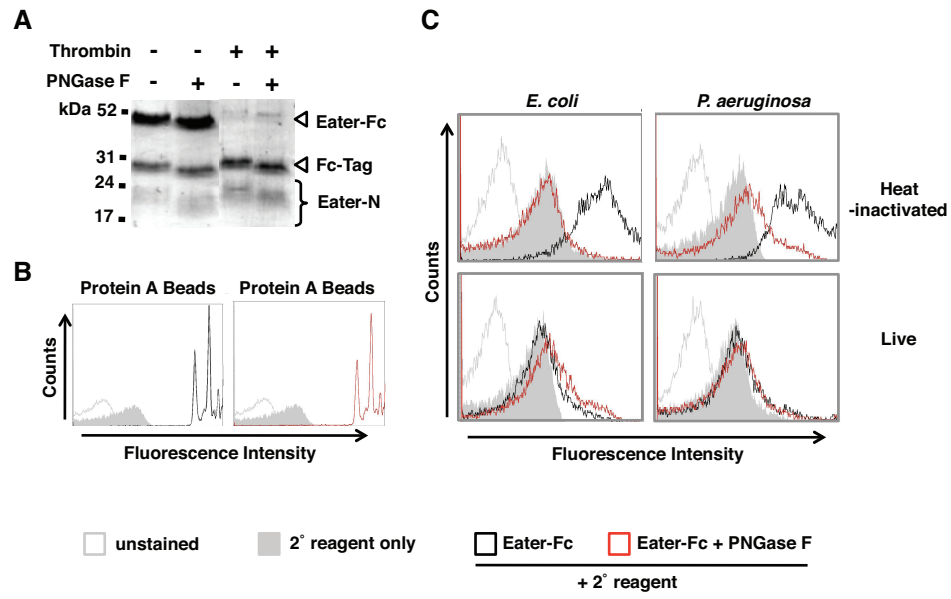

FIGURE S2

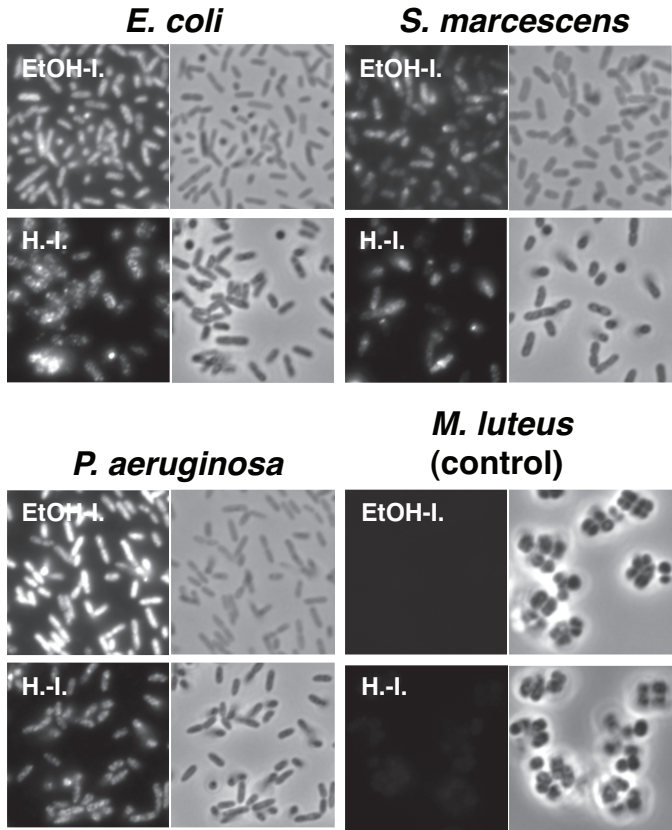



FIGURE S3

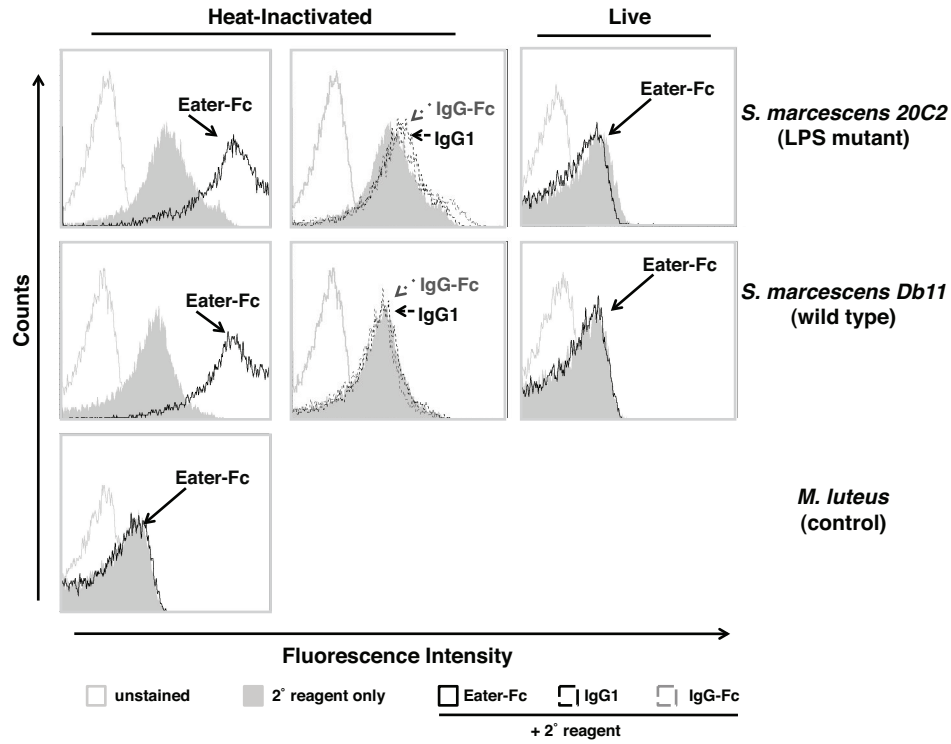

FIGURE S4

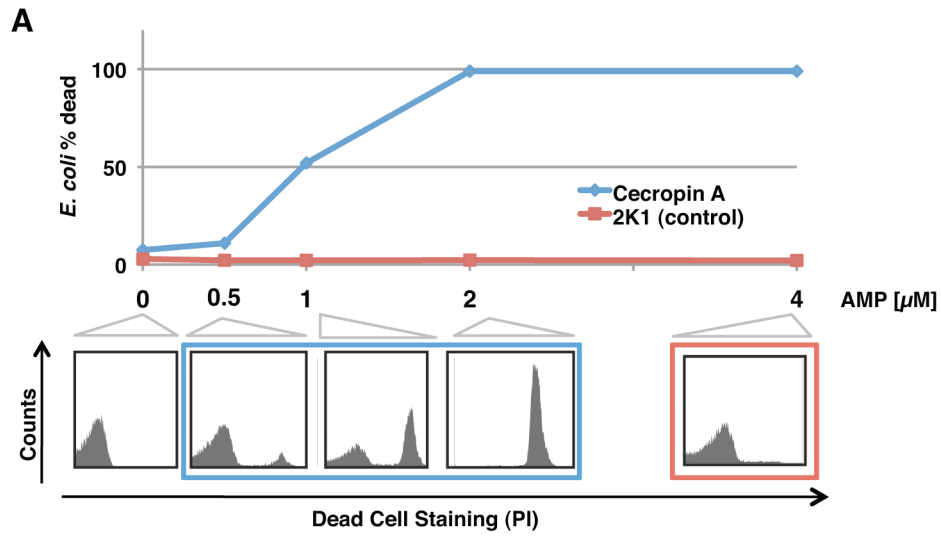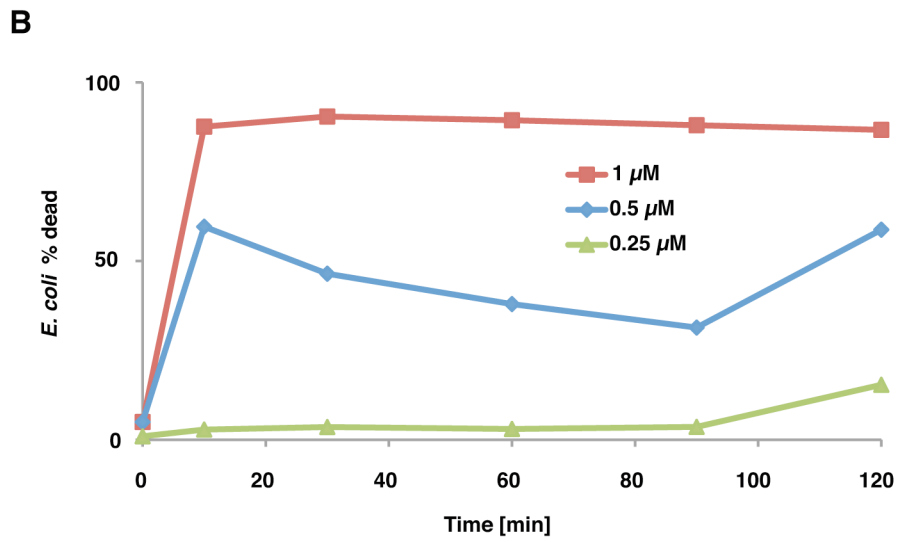

FIGURE S5

**A**

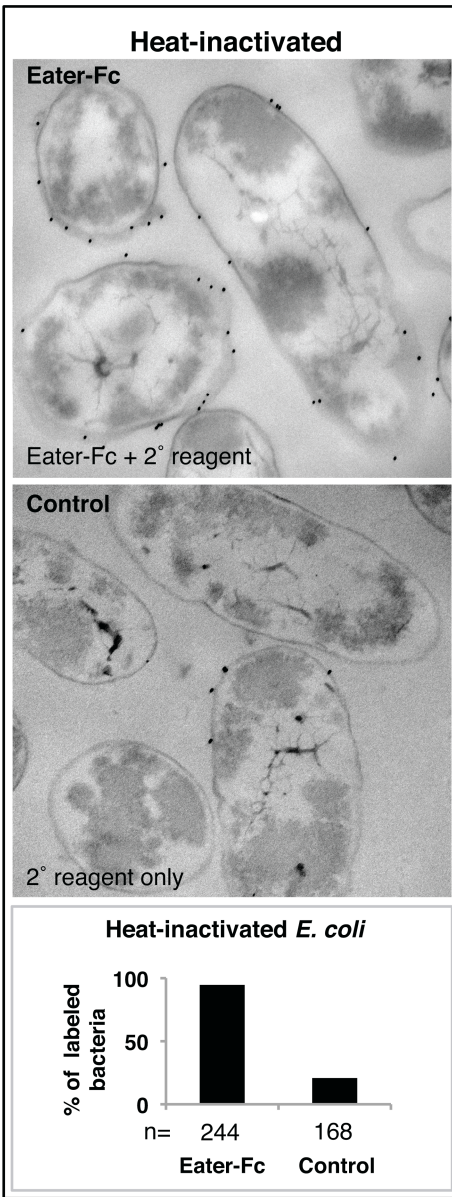

**B**

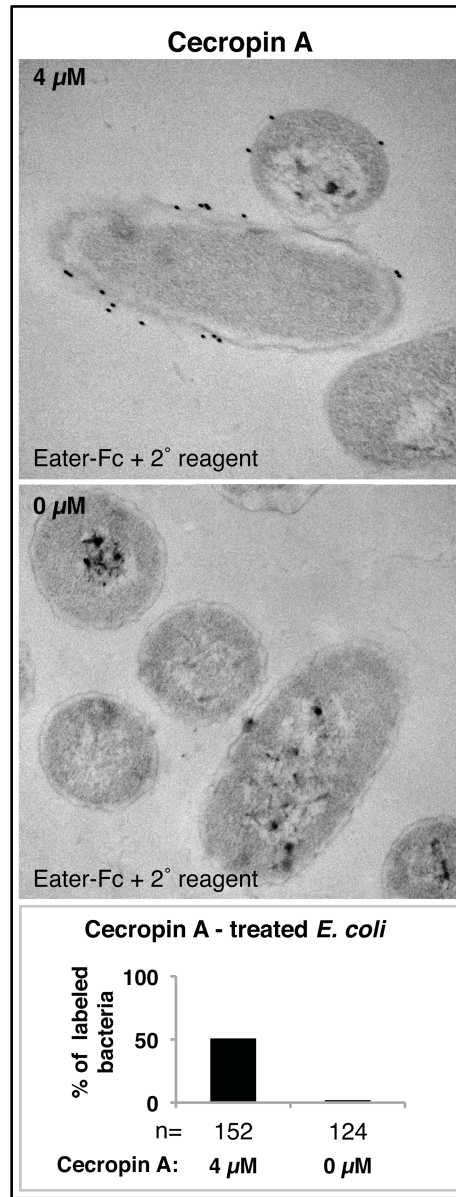

Supplement: supp_M110.214007_jbc.M110.214007-1.pdf [file supp_M110.214007_jbc.M110.214007-1.pdf]
